# Supplementary material for: Liquid Biopsy in Lung Cancer Screening: The Contribution of Metabolomics. Results of A Pilot Study
Source: MDPI journal article supplement (doi:10.3390/cancers11081069), 2019-07-29
Supplement: s1 [file s1]

# Supplementary materials

## Training

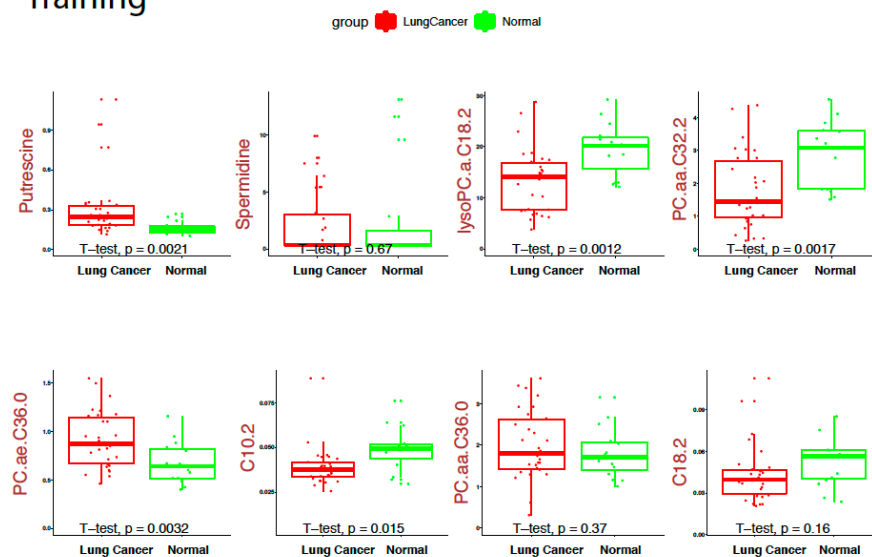

## Validation

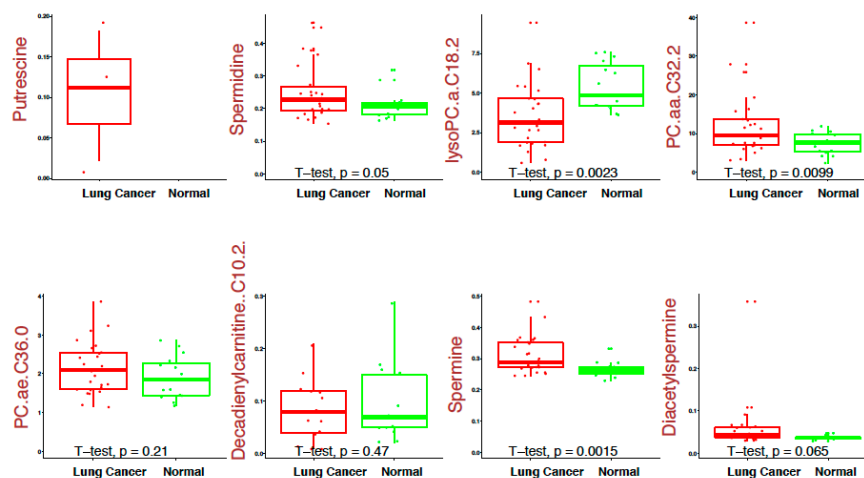

Figure 1. The full range of the Box Plots.

Table S1

Table 1A: Training cohort

|               | Lung cancer subtypes |              |                  |                |                | Age (yr) |
|---------------|----------------------|--------------|------------------|----------------|----------------|----------|
|               | Adenocarcinoma (n)   | Squamous (n) | Non Squamous (n) | Small cell (n) | Metastasis (n) | Mean±SD  |
| Female (n=18) | 13                   | 5            | -                | -              | -              | 47±2     |
| Male (n=13)   | 9                    | 3            | -                | 1              | -              | 56±2     |
| Total (n= 31) | 22                   | 8            | -                | 1              | -              | 52±2     |

\*\* Majority of patient at advanced stage 3+

Table 1B: Validation cohort

|              | Lung cancer subtypes |              |                  |                |                | Age (yr) |
|--------------|----------------------|--------------|------------------|----------------|----------------|----------|
|              | Adenocarcinoma (n)   | Squamous (n) | Non Squamous (n) | Small cell (n) | Metastasis (n) | Mean±SD  |
| Female (n=9) | 2                    | 2            | 1                | 2              | 2              | 54±3     |
| Male (n=17)  | 4                    | 5            | 5                | 3              | -              | 56±3     |
| Total (n=26) | 6                    | 7            | 6                | 5              | 2              | 56±2     |

\*\* Majority of patient at advanced stage 3+

Table 1C: Summary table of normal vs Lung cancer

|                          | Tranining             |                      |             | Validation            |                      |                 |
|--------------------------|-----------------------|----------------------|-------------|-----------------------|----------------------|-----------------|
|                          | Lung Cancer (n)       | Normal (n)           | Pvalue      | Lung Cancer (n)       | Normal (n)           | Pvalue          |
| <b>Samples</b>           | <b>31</b>             | <b>15</b>            |             | <b>26</b>             | <b>15</b>            |                 |
| <b>Age:</b>              | <b>Mean±SD</b>        | <b>Mean±SD</b>       |             | <b>Mean±SD</b>        | <b>Mean±SD</b>       |                 |
| <b>Mean (Range) (yr)</b> | <b>50.7 (27 - 75)</b> | <b>43.7 (27 -56)</b> | <b>0.06</b> | <b>55.7 (27 - 70)</b> | <b>43.7 (27 -56)</b> | <b>0.000213</b> |
| <b>Sex:</b>              |                       |                      |             |                       |                      |                 |
| <b>Male</b>              | <b>13</b>             | <b>6</b>             | <b>0.75</b> | <b>17</b>             | <b>6</b>             | <b>0.12</b>     |
| <b>Female</b>            | <b>18</b>             | <b>9</b>             |             | <b>9</b>              | <b>9</b>             |                 |

Table S2

Table 2: Statistical summary of samples and metabolite measures

| Targeted metabolites        | Metabolites Classification      | Patient Classification | Cohort     | Number of samples | Number of missing samples | min value of metabolite | max value of metabolite | Median  | Mean     |
|-----------------------------|---------------------------------|------------------------|------------|-------------------|---------------------------|-------------------------|-------------------------|---------|----------|
| Valine                      | Amino Acids and Biogenic Amines | Normal                 | Training   | 15                | 0                         | 198                     | 376                     | 263     | 267.0667 |
| Putrescine                  | Polyamine Metabolites           | Normal                 | Training   | 15                | 0                         | 0.104                   | 0.269                   | 0.154   | 0.1637   |
| Methionine                  | Polyamine Metabolites           | Normal                 | Training   | 15                | 0                         | 17.7                    | 35.9                    | 25.8    | 26.5133  |
| Arginine                    | Polyamine Metabolites           | Normal                 | Training   | 15                | 0                         | 72.4                    | 234                     | 120     | 137.3933 |
| Ornithine                   | Polyamine Metabolites           | Normal                 | Training   | 15                | 0                         | 56.6                    | 142                     | 72.5    | 79.14    |
| Spermidine                  | Polyamine Metabolites           | Normal                 | Training   | 15                | 0                         | 0.256                   | 13.1                    | 0.335   | 2.7091   |
| C10.2                       | Acylcarnitines                  | Normal                 | Training   | 15                | 0                         | 0.0297                  | 0.076                   | 0.0493  | 0.0489   |
| C18.2                       | Acylcarnitines                  | Normal                 | Training   | 15                | 0                         | 0.0238                  | 0.0853                  | 0.0567  | 0.0522   |
| lysoPC.a.C18.2              | Glycerophospholipids            | Normal                 | Training   | 15                | 0                         | 12.1476                 | 29.259                  | 20.1631 | 19.521   |
| PC.aa.C32.2                 | Glycerophospholipids            | Normal                 | Training   | 15                | 0                         | 1.5099                  | 4.5478                  | 3.0779  | 2.9107   |
| PC.aa.C36.0                 | Glycerophospholipids            | Normal                 | Training   | 15                | 0                         | 1.008                   | 3.1557                  | 1.7134  | 1.803    |
| PC.ac.C36.0                 | Glycerophospholipids            | Normal                 | Training   | 15                | 0                         | 0.4003                  | 1.157                   | 0.6427  | 0.6749   |
| Valine                      | Amino Acids and Biogenic Amines | Lung Cancer            | Training   | 31                | 0                         | 135                     | 369                     | 193     | 208      |
| Putrescine                  | Polyamine Metabolites           | Lung Cancer            | Training   | 31                | 0                         | 0.115                   | 1.13                    | 0.2475  | 0.3099   |
| Methionine                  | Polyamine Metabolites           | Lung Cancer            | Training   | 31                | 0                         | 11.6                    | 63.6                    | 22.25   | 24.0533  |
| Arginine                    | Polyamine Metabolites           | Lung Cancer            | Training   | 31                | 0                         | 37.7                    | 262                     | 95.6    | 112.2867 |
| Ornithine                   | Polyamine Metabolites           | Lung Cancer            | Training   | 31                | 0                         | 47.1                    | 167                     | 69.35   | 76.13    |
| Spermidine                  | Polyamine Metabolites           | Lung Cancer            | Training   | 31                | 0                         | 0.333                   | 9.9                     | 0.335   | 2.14     |
| C10.2                       | Acylcarnitines                  | Lung Cancer            | Training   | 31                | 0                         | 0.0255                  | 0.0889                  | 0.0376  | 0.039    |
| C18.2                       | Acylcarnitines                  | Lung Cancer            | Training   | 31                | 0                         | 0.0208                  | 0.1127                  | 0.0398  | 0.0438   |
| lysoPC.a.C18.2              | Glycerophospholipids            | Lung Cancer            | Training   | 31                | 0                         | 3.815                   | 28.7725                 | 14.1162 | 13.3528  |
| PC.aa.C32.2                 | Glycerophospholipids            | Lung Cancer            | Training   | 31                | 0                         | 0.2588                  | 4.3734                  | 1.4442  | 1.78149  |
| PC.aa.C36.0                 | Glycerophospholipids            | Lung Cancer            | Training   | 31                | 0                         | 0.3143                  | 3.6154                  | 1.8023  | 2.0029   |
| PC.ac.C36.0                 | Glycerophospholipids            | Lung Cancer            | Training   | 31                | 0                         | 0.4613                  | 1.5473                  | 0.8711  | 0.9148   |
| Valine                      | Amino Acids and Biogenic Amines | Normal                 | Validation | 15                | 0                         | 233                     | 442                     | 280     | 294.5333 |
| Arginine                    | Polyamine Metabolites           | Normal                 | Validation | 15                | 0                         | 75.1                    | 237                     | 116     | 139.88   |
| Ornithine                   | Polyamine Metabolites           | Normal                 | Validation | 15                | 0                         | 27                      | 90                      | 47.3    | 50.7533  |
| Methionine                  | Polyamine Metabolites           | Normal                 | Validation | 15                | 0                         | 27.5                    | 63.1                    | 38.4    | 39.02    |
| Spermidine                  | Polyamine Metabolites           | Normal                 | Validation | 15                | 0                         | 0.164                   | 0.319                   | 0.208   | 0.2118   |
| Spermine                    | Polyamine Metabolites           | Normal                 | Validation | 15                | 0                         | 0.23                    | 0.332                   | 0.263   | 0.2655   |
| Diacylspermine              | Acylcarnitines                  | Normal                 | Validation | 15                | 0                         | 0.0287                  | 0.0473                  | 0.0364  | 0.0369   |
| Decadienylcarnitine (C10.2) | Acylcarnitines                  | Normal                 | Validation | 13                | 2                         | 0.02                    | 0.29                    | 0.07    | 0.1008   |
| PC.aa.C32.2                 | Glycerophospholipids            | Normal                 | Validation | 15                | 0                         | 2.37                    | 11.89                   | 7.69    | 7.3293   |
| PC.ac.C36.0                 | Glycerophospholipids            | Normal                 | Validation | 15                | 0                         | 1.17                    | 2.86                    | 1.85    | 1.9033   |
| lysoPC.a.C18.2              | Glycerophospholipids            | Normal                 | Validation | 15                | 0                         | 3.63                    | 7.59                    | 4.87    | 5.4073   |
| MTA                         | Polyamine Metabolites           | Lung Cancer            | Validation | 9                 | 17                        | 0.0041                  | 0.267                   | 0.0945  | 0.1067   |
| Valine                      | Amino Acids and Biogenic Amines | Lung Cancer            | Validation | 26                | 0                         | 120                     | 316                     | 192     | 204.6154 |
| Arginine                    | Polyamine Metabolites           | Lung Cancer            | Validation | 26                | 0                         | 51.6                    | 252                     | 89.8    | 116.8347 |
| Ornithine                   | Polyamine Metabolites           | Lung Cancer            | Validation | 26                | 0                         | 17.4                    | 93.7                    | 47.15   | 45.9423  |
| Methionine                  | Polyamine Metabolites           | Lung Cancer            | Validation | 26                | 0                         | 14.5                    | 50.8                    | 31.8    | 31.4423  |
| Putrescine                  | Polyamine Metabolites           | Lung Cancer            | Validation | 3                 | 23                        | 0.0219                  | 0.182                   | 0.112   | 0.1053   |
| Spermidine                  | Polyamine Metabolites           | Lung Cancer            | Validation | 26                | 0                         | 0.154                   | 0.464                   | 0.2285  | 0.2531   |
| Spermine                    | Polyamine Metabolites           | Lung Cancer            | Validation | 26                | 0                         | 0.245                   | 0.482                   | 0.2885  | 0.3108   |
| Diacylspermine              | Acylcarnitines                  | Lung Cancer            | Validation | 26                | 0                         | 0.0297                  | 0.358                   | 0.0423  | 0.0611   |
| Decadienylcarnitine (C10.2) | Acylcarnitines                  | Lung Cancer            | Validation | 15                | 11                        | 0.01                    | 0.21                    | 0.08    | 0.0813   |
| PC.aa.C32.2                 | Glycerophospholipids            | Lung Cancer            | Validation | 26                | 0                         | 3.08                    | 38.67                   | 9.48    | 12.1392  |
| PC.ac.C36.0                 | Glycerophospholipids            | Lung Cancer            | Validation | 26                | 0                         | 1.14                    | 3.86                    | 2.095   | 2.1485   |
| lysoPC.a.C18.2              | Glycerophospholipids            | Lung Cancer            | Validation | 26                | 0                         | 0.6                     | 9.44                    | 3.13    | 3.5692   |

Table S3

**Table 3A: Univariate Summary Measure of each Metabolite**

|                | Training |          |           | Validation |          |           |
|----------------|----------|----------|-----------|------------|----------|-----------|
|                | AUC      | P value  | FC        | AUC        | P value  | FC        |
| Arginine       | 6.61E-01 | 1.30E-01 | -3.25E-01 | 6.64E-01   | 1.33E-01 | -3.26E-01 |
| C10.2          | 7.71E-01 | 9.44E-03 | -1.28E-01 | NA         | NA       | NA        |
| C18.2          | 6.73E-01 | 1.85E-01 | -1.11E-01 | NA         | NA       | NA        |
| Diacetylspermi | NA       | NA       | NA        | 7.60E-01   | 2.59E-02 | 2.12E-01  |
| lysoPC.a.C18.2 | 7.73E-01 | 1.86E-03 | -6.60E-01 | 7.65E-01   | 3.16E-03 | -8.15E-01 |
| Methionine     | 6.67E-01 | 4.01E-01 | -2.19E-01 | 6.85E-01   | 2.08E-02 | -3.44E-01 |
| Ornithine      | 5.46E-01 | 6.97E-01 | -6.91E-02 | 5.69E-01   | 3.21E-01 | -1.70E-01 |
| PC.aa.C32.2    | 7.96E-01 | 2.12E-03 | -9.63E-01 | 6.94E-01   | 2.75E-02 | 5.91E-01  |
| PC.aa.C36.0    | 5.71E-01 | 4.13E-01 | 7.44E-02  | NA         | NA       | NA        |
| PC.ac.C36.0    | 7.51E-01 | 6.69E-03 | 4.28E-01  | 6.12E-01   | 2.53E-01 | 1.64E-01  |
| Putrescine     | 8.33E-01 | 2.03E-02 | 6.64E-01  | NA         | NA       | NA        |
| Spermidine     | 5.89E-01 | 6.12E-01 | 2.46E-01  | 6.29E-01   | 1.11E-01 | 1.90E-01  |
| Spermine       | NA       | NA       | NA        | 7.67E-01   | 5.20E-03 | 1.95E-01  |
| Valine         | 8.04E-01 | 2.19E-03 | -3.83E-01 | 9.09E-01   | 2.58E-06 | -5.33E-01 |

AUC – Area Under the Curve; FC – Fold Change, NA - Not available

**Table 3B: t-tests for key Metabolites using training data (A) and validation data (B)**

| Training Data A   |             |          |                        |          |
|-------------------|-------------|----------|------------------------|----------|
| Metabolites       | t-statistic | P value  | -log <sub>10</sub> (p) | FDR      |
| Putrescine        | 3.54E+00    | 9.88E-04 | 3.01E+00               | 6.44E-03 |
| Valine            | -3.51E+00   | 1.07E-03 | 2.97E+00               | 6.44E-03 |
| lysoPC.a.C18.2    | 3.30E+00    | 1.97E-03 | 2.70E+00               | 7.89E-03 |
| PC.aa.C32.2       | -3.18E+00   | 2.72E-03 | 2.57E+00               | 8.15E-03 |
| PC.ac.C36.0       | 3.02E+00    | 4.27E-03 | 2.37E+00               | 9.32E-03 |
| C10.2             | -2.99E+00   | 4.66E-03 | 2.33E+00               | 9.32E-03 |
| Validation Data B |             |          |                        |          |
| Metabolites       | t-statistic | P value  | -log <sub>10</sub> (p) | FDR      |
| Valine            | -5.50E+00   | 2.58E-06 | 5.59E+00               | 2.58E-05 |
| lysoPC.a.C18.2    | -3.15E+00   | 3.16E-03 | 2.50E+00               | 1.58E-02 |
| Spermine          | 2.96E+00    | 5.20E-03 | 2.28E+00               | 1.73E-02 |
| Methionine        | -2.41E+00   | 2.08E-02 | 1.68E+00               | 4.59E-02 |
| Diacetylsperminc  | 2.32E+00    | 2.59E-02 | 1.59E+00               | 4.59E-02 |
| PC aa. C32:2      | 2.29E+00    | 2.75E-02 | 1.56E+00               | 4.59E-02 |

-log<sub>10</sub> (p), FDR False Discovery Rate; t-statistic,

**Table 3C:** Training data, generalized linear regression multivariate model statistics – key metabolites

|             | <b>Estimate</b> | <b>S.E.</b> | <b>P value</b> |
|-------------|-----------------|-------------|----------------|
| (Intercept) | 0.9438          | 0.2969      | 0.0029         |
| Valine      | 0.0012          | 0.0011      | 0.2724         |
| Putrescine  | -0.6203         | 0.2991      | 0.0447         |
| PC.aa.C32.2 | 0.1294          | 0.0563      | 0.027          |
| PC.aa.C36.0 | -0.2273         | 0.08        | 0.0071         |
| C10.2       | 10.3848         | 5.2603      | 0.0555         |

**Table 3D:** Validation data, generalized linear regression multivariate model statistics – key metabolites

|             | <b>Estimate</b> | <b>S. E.</b> | <b>P Value</b> |
|-------------|-----------------|--------------|----------------|
| (Intercept) | 1.3407          | 0.4139       | 0.0025         |
| Valine      | 0.0051          | 0.0009       | 1.84E-06       |
| Spermine    | -2.8954         | 1.0274       | 0.0077         |
| Ornithine   | -0.007          | 0.0036       | 0.0633         |

S.E., Standard Error
